# Supplementary material for: Sodium Intakes of US Children and Adults from Foods and Beverages by Location of Origin and by Specific Food Source
Source: Nutrients. 2013 May 28;5(6):1840–55. doi: 10.3390/nu5061840 (PMC3725480; doi:10.3390/nu5061840)
Supplement: Supplementary File 1 — Supplementary Information (PDF, 67 KB) [file nutrients-05-01840-s001.pdf]

## Supplementary Information

**Table S1.** Proportion of total sodium by category and source for children (age 6–11 years).

| Category and Source of Sodium           | % of Total <sup>1</sup> |
|-----------------------------------------|-------------------------|
| Yeast breads-Store                      | 5.7                     |
| Pasta and pasta dishes-Store            | 5.5                     |
| Sausage, franks, bacon, and ribs-Store  | 4.3                     |
| Pizza-QSR                               | 3.4                     |
| Ready-to-eat cereals-Store              | 3.0                     |
| Grain-based desserts-Store              | 2.7                     |
| Regular cheese-Store                    | 2.7                     |
| Soups-Store                             | 2.6                     |
| Chicken and chicken mixed dishes-Store  | 2.5                     |
| Chicken and chicken mixed dishes-QSR    | 2.2                     |
| Pizza-Store                             | 2.1                     |
| Potato/corn/other chips-Store           | 2.1                     |
| Beef and beef mixed dishes-Store        | 2.1                     |
| Cold cuts-Store                         | 2.0                     |
| Reduced fat milk-Store                  | 1.9                     |
| Pancakes/waffles/French toast-Store     | 1.8                     |
| Burgers-QSR                             | 1.5                     |
| Rice and rice mixed dishes-Store        | 1.4                     |
| Mexican mixed dishes-Store              | 1.3                     |
| Pizza-School                            | 1.3                     |
| Crackers-Store                          | 1.2                     |
| Eggs and egg mixed dishes-Store         | 1.2                     |
| Reduced fat milk-School                 | 1.1                     |
| Quickbreads-Store                       | 1.1                     |
| Chicken and chicken mixed dishes-School | 1.0                     |
| Mexican mixed dishes-QSR                | 1.0                     |
| Pizza-FSR                               | 1.0                     |
| Condiments-Store                        | 1.0                     |
| Whole milk-Store                        | 1.0                     |
| Others <sup>2</sup>                     | 38.1                    |
| Others-not store, QSR, FSR or school    | 9.1                     |

<sup>1</sup> May not sum to 100 due to rounding; <sup>2</sup> Less than 1% of total sodium.

**Table S2.** Proportion of total sodium by category and source for adolescents (age 12–19 years).

| Category and Source of Sodium          | % of Total <sup>1</sup> |
|----------------------------------------|-------------------------|
| Yeast breads-Store                     | 5.5                     |
| Pizza-QSR                              | 5.4                     |
| Pasta and pasta dishes-Store           | 4.3                     |
| Sausage, franks, bacon, and ribs-Store | 3.3                     |
| Chicken and chicken mixed dishes-QSR   | 3.0                     |
| Cold cuts-Store                        | 2.9                     |
| Pizza-Store                            | 2.7                     |
| Ready-to-eat cereals-Store             | 2.5                     |
| Soups-Store                            | 2.5                     |
| Chicken and chicken mixed dishes-Store | 2.5                     |
| Regular cheese-Store                   | 2.4                     |
| Burgers-QSR                            | 2.4                     |
| Beef and beef mixed dishes-Store       | 2.4                     |
| Grain-based desserts-Store             | 2.4                     |
| Potato/corn/other chips-Store          | 2.3                     |
| Mexican mixed dishes-Store             | 1.7                     |
| Mexican mixed dishes-QSR               | 1.6                     |
| Reduced fat milk-Store                 | 1.6                     |
| Chicken and chicken mixed dishes-FSR   | 1.4                     |
| Rice and rice mixed dishes-Store       | 1.4                     |
| Soda, energy and sports drinks-Store   | 1.3                     |
| Quickbreads-Store                      | 1.2                     |
| Eggs and egg mixed dishes-Store        | 1.1                     |
| Salad dressing-Store                   | 1.1                     |
| Pizza-FSR                              | 1.0                     |
| Pizza-School                           | 1.0                     |
| Condiments-Store                       | 1.0                     |
| Crackers-Store                         | 1.0                     |
| Others <sup>2</sup>                    | 31.0                    |
| Others-not store, QSR or FSR           | 6.3                     |

<sup>1</sup> May not sum to 100 due to rounding; <sup>2</sup> Less than 1% of total sodium.

**Table S3.** Proportion of total sodium by category and source for adults (age 20–50 years).

| Category and Source of Sodium          | % of Total <sup>1</sup> |
|----------------------------------------|-------------------------|
| Yeast breads-Store                     | 5.1                     |
| Pasta and pasta dishes-Store           | 3.7                     |
| Pizza-QSR                              | 3.7                     |
| Sausage, franks, bacon, and ribs-Store | 3.4                     |
| Chicken and chicken mixed dishes-Store | 2.7                     |
| Beef and beef mixed dishes-Store       | 2.7                     |
| Chicken and chicken mixed dishes-QSR   | 2.6                     |
| Cold cuts-Store                        | 2.6                     |
| Regular cheese-Store                   | 2.5                     |
| Soups-Store                            | 2.4                     |
| Grain-based desserts-Store             | 2.1                     |
| Mexican mixed dishes-QSR               | 1.9                     |
| Rice and rice mixed dishes-Store       | 1.9                     |
| Burgers-QSR                            | 1.8                     |
| Quickbreads-Store                      | 1.6                     |
| Mexican mixed dishes-Store             | 1.5                     |
| Chicken and chicken mixed dishes-FSR   | 1.5                     |
| Pizza-Store                            | 1.5                     |
| Ready-to-eat cereals-Store             | 1.5                     |
| Potato/corn/other chips-Store          | 1.4                     |
| Salad dressing-Store                   | 1.3                     |
| Eggs and egg mixed dishes-Store        | 1.3                     |
| Pork and pork mixed dishes-Store       | 1.2                     |
| Soda, energy and sports drinks-Store   | 1.1                     |
| Reduced fat milk-Store                 | 1.0                     |
| Condiments-Store                       | 1.0                     |
| Others <sup>2</sup>                    | 45.1                    |

<sup>1</sup> May not sum to 100 due to rounding; <sup>2</sup> Less than 1% of total sodium.

**Table S4.** Proportion of total sodium by category and source for adults (age  $\geq 51$  years).

| Category and Source of Energy              | % of Total <sup>1</sup> |
|--------------------------------------------|-------------------------|
| Yeast breads-Store                         | 7.1                     |
| Sausage, franks, bacon, and ribs-Store     | 3.7                     |
| Soups-Store                                | 3.3                     |
| Pasta and pasta dishes-Store               | 2.8                     |
| Beef and beef mixed dishes-Store           | 2.8                     |
| Cold cuts-Store                            | 2.7                     |
| Grain-based desserts-Store                 | 2.6                     |
| Regular cheese-Store                       | 2.5                     |
| Chicken and chicken mixed dishes-Store     | 2.4                     |
| Ready-to-eat cereals-Store                 | 1.9                     |
| Quickbreads-Store                          | 1.6                     |
| Eggs and egg mixed dishes-Store            | 1.6                     |
| Rice and rice mixed dishes-Store           | 1.6                     |
| Salad dressing-Store                       | 1.6                     |
| Pork and pork mixed dishes-Store           | 1.5                     |
| Pizza-QSR                                  | 1.4                     |
| Chicken and chicken mixed dishes-QSR       | 1.4                     |
| Other white potatoes-Store                 | 1.3                     |
| Chicken and chicken mixed dishes-FSR       | 1.3                     |
| Crackers-Store                             | 1.2                     |
| Mexican mixed dishes-Store                 | 1.2                     |
| Reduced fat milk-Store                     | 1.2                     |
| Potato/corn/other chips-Store              | 1.0                     |
| Burgers-QSR                                | 1.0                     |
| Nuts/seeds and nut/seed mixed dishes-Store | 1.0                     |
| Others <sup>2</sup>                        | 48.1                    |

<sup>1</sup> May not sum to 100 due to rounding; <sup>2</sup> Less than 1% of total energy.
